# Supplementary material for: Efficacy of the ‘Stand and Move at Work’ multicomponent workplace intervention to reduce sedentary time and improve cardiometabolic risk: a group randomized clinical trial
Source: PubMed Central journal article supplement (PMC7592578; doi:10.1186/s12966-020-01033-3), 2020-10-27
Supplement: 12966_2020_1033_MOESM1_ESM.pdf [file 12966_2020_1033_MOESM1_ESM.pdf]

Supplemental Table 1. Baseline demographics of the analyzed sample by study arm.

|                                      | <i>STAND+</i> | <i>MOVE+</i> | Total        |
|--------------------------------------|---------------|--------------|--------------|
|                                      | n (%)         | n (%)        | N (%)        |
| N worksites                          | 12 (50.0)     | 12 (50.0)    | 24 (100.0)   |
| N individuals                        | 263 (54.0)    | 224 (46.0)   | 487 (100.0)  |
| Region                               |               |              |              |
| Phoenix, Arizona                     | 137 (52.1)    | 102 (45.5)   | 239 (49.1)   |
| Minneapolis/St. Paul, Minnesota      | 126 (47.9)    | 122 (54.5)   | 248 (50.9)   |
| Age (years)                          | 46.6 ±10.9    | 43.7 ±10.6   | 45.3 ±10.8   |
| Race                                 |               |              |              |
| Non-Hispanic White                   | 183 (69.6)    | 169 (75.5)   | 352 (72.3)   |
| Hispanic                             | 37 (14.1)     | 26 (11.6)    | 63 (12.9)    |
| Non-Hispanic Black                   | 15 (5.7)      | 6 (2.7)      | 21 (4.3)     |
| Non-Hispanic Asian                   | 12 (4.6)      | 14 (6.3)     | 26 (5.3)     |
| Other/Multiracial/Unknown            | 16 (6.1)      | 9 (4.0)      | 25 (5.1)     |
| Female                               | 220 (83.7)    | 134 (59.8)   | 354 (72.7)   |
| Education                            |               |              |              |
| Less than college                    | 10 (3.8)      | 13 (5.8)     | 23 (4.7)     |
| College/Some college                 | 178 (67.7)    | 127 (56.7)   | 305 (62.6)   |
| Graduate/Professional                | 68 (25.9)     | 78 (34.8)    | 146 (30.0)   |
| Unknown                              | 7 (2.7)       | 6 (2.7)      | 13 (2.7)     |
| Work sector                          |               |              |              |
| Academic                             | 95 (36.1)     | 76 (33.9)    | 171 (35.1)   |
| Industry/healthcare                  | 82 (31.2)     | 66 (29.5)    | 148 (30.4)   |
| Government                           | 86 (32.7)     | 82 (36.6)    | 168 (34.5)   |
| Job type                             |               |              |              |
| Executive                            | 35 (13.3)     | 31 (13.8)    | 66 (13.6)    |
| Professional                         | 141 (53.6)    | 133 (59.4)   | 274 (56.3)   |
| Clerical                             | 83 (31.6)     | 56 (25.0)    | 139 (28.5)   |
| Behavioral Outcomes                  |               |              |              |
| Work periods (min per 8 h workday)   |               |              |              |
| Sitting                              | 328.6 ±80.9   | 334.8 ±73.7  | 331.4 ±77.7  |
| Standing                             | 115.2 ±76.5   | 107.3 ±71.6  | 111.6 ±74.3  |
| LPA                                  | 30.6 ±14.9    | 31.3 ±15.6   | 31.0 ±15.2   |
| MVPA                                 | 5.6 ±4.7      | 6.5 ±5.5     | 6.0 ±5.1     |
| LPA + MVPA                           | 36.3 ±16.3    | 37.9 ±17.5   | 37.0 ±16.9   |
| Prolonged sitting (>30 min)          | 141.2 ±90.5   | 156.7 ±85.4  | 148.3 ±88.4  |
| Sit-stand transitions (n/sitting-hr) | 7.9 ±5.9      | 6.1 ±6.7     | 7.1 ±6.3     |
| Total time (min per day)             |               |              |              |
| Sitting                              | 615.9 ±97.7   | 617.9 ±87.7  | 616.8 ±93.2  |
| Standing                             | 245.2 ±85.4   | 242.0 ±76.7  | 243.8 ±81.4  |
| LPA                                  | 81.4 ±28.6    | 81.5 ±28.8   | 81.5 ±28.6   |
| MVPA                                 | 17.5 ±7.8     | 18.6 ±7.3    | 18.0 ±7.6    |
| LPA + MVPA                           | 98.9 ±32.4    | 100.1 ±32.6  | 99.4 ±32.4   |
| Prolonged sitting (>30 min)          | 306.4 ±109.3  | 314.4 ±99.1  | 310.1 ±104.7 |
| Sit-stand transitions (n/sitting-hr) | 6.1 ±2.2      | 5.4 ±1.9     | 5.7 ±2.1     |
| Cardiometabolic risk biomarkers      |               |              |              |
| Total sample                         |               |              |              |
| CMR (sum of Z scores)                | 0.00 ±0.7     | 0.01 ±0.6    | 0.01 ±0.7    |
| Fasting glucose (mg/dL)              | 95.3 ±33.8    | 91.5 ±14.2   | 93.5 ±26.6   |
| Fasting insulin (uU/mL)              | 77.6 ±59.1    | 70.7 ±50.8   | 74.4 ±55.5   |
| HDL-cholesterol (mg/dL)              | 60.3 ±17.9    | 56.3 ±16.8   | 58.4 ±17.5   |
| Triglycerides (mg/dL)                | 117.5 ±64.8   | 123.7 ±71.0  | 120.4 ±67.7  |
| Diastolic BP (mm Hg)                 | 77.8 ±10.7    | 77.7 ±10.7   | 77.8 ±10.7   |
| Systolic BP (mm Hg)                  | 125.4 ±15.9   | 124.1 ±15.9  | 124.8 ±15.9  |
| LDL-cholesterol (mg/dL)              | 110.7 ±29.4   | 114.5 ±34.4  | 112.5 ±31.8  |
| Weight (kg)                          | 82.6 ±22.5    | 83.5 ±20.7   | 83 ±21.6     |
| BMI (kg/m <sup>2</sup> )             | 29.9 ±7.6     | 28.8 ±6.4    | 29.4 ±7.1    |
| Total body fat (%)                   | 36.7 ±9.6     | 32.6 ±10.3   | 34.8 ±10.2   |

CMR = summary continuous metabolic risk score; HDL = high-density lipoprotein; BP = blood pressure; BMI = body mass index.
