# Supplementary material for: Efficacy of the ‘Stand and Move at Work’ multicomponent workplace intervention to reduce sedentary time and improve cardiometabolic risk: a group randomized clinical trial
Source: PubMed Central journal article supplement (PMC7592578; doi:10.1186/s12966-020-01033-3), 2020-10-27
Supplement: 12966_2020_1033_MOESM2_ESM.pdf [file 12966_2020_1033_MOESM2_ESM.pdf]

Supplemental Table 2. Baseline demographics of the dysglycemic sample by study arm.

|                          | <i>STAND+</i> | <i>MOVE+</i> | Total       |
|--------------------------|---------------|--------------|-------------|
|                          | n (%)         | n (%)        | N (%)       |
| Dysglycemic subgroup     |               |              |             |
| <i>n</i> individuals     | 57 (60.0)     | 38 (40.0)    | 95 (100.0)  |
| CMR (sum of Z scores)    | 0.7 ±0.8      | 0.5 ±0.7     | 0.6 ±0.8    |
| Fasting glucose (mg/dL)  | 129.5 ±66.8   | 111.8 ±20.0  | 122.4 ±53.8 |
| HDL-cholesterol (mg/dL)  | 52.4 ±14.1    | 52.7 ±18.7   | 52.5 ±16.0  |
| Triglycerides (mg/dL)    | 142.4 ±70.7   | 159.9 ±98.5  | 149.4 ±82.9 |
| Diastolic BP (mm Hg)     | 83.4 ±10.4    | 81.4 ±11.2   | 82.6 ±10.7  |
| Systolic BP (mm Hg)      | 135.5 ±15.8   | 131.7 ±18.7  | 134.0 ±17.0 |
| HbA1c                    | 6.2 ±1.4      | 5.7 ±0.7     | 6.0 ±1.2    |
| LDL-cholesterol (mg/dL)  | 118.0 ±30.6   | 116.5 ±34.2  | 117.4 ±31.9 |
| Weight (kg)              | 98.0 ±24.0    | 94.1 ±22.1   | 96.5 ±23.2  |
| BMI (kg/m <sup>2</sup> ) | 35.3 ±8.4     | 32.1 ±6.9    | 34.0 ±8.0   |
| Total body fat (%)       | 42.0 ±9.3     | 36.9 ±10.2   | 40.0 ±9.9   |

CMR = summary continuous metabolic risk score; HDL = high-density lipoprotein; BP = blood pressure; BMI = body mass index.
