# Supplementary material for: Efficacy of the ‘Stand and Move at Work’ multicomponent workplace intervention to reduce sedentary time and improve cardiometabolic risk: a group randomized clinical trial
Source: PubMed Central journal article supplement (PMC7592578; doi:10.1186/s12966-020-01033-3), 2020-10-27
Supplement: 12966_2020_1033_MOESM3_ESM.pdf [file 12966_2020_1033_MOESM3_ESM.pdf]

Supplementary Table 3. Intervention effects on cardiometabolic risk biomarkers at 12 months

|                             | <i>STAND+</i>                    | <i>MOVE+</i>                     | Difference, <i>STAND+</i><br>- <i>MOVE+</i> (95% CI) | ICC  |
|-----------------------------|----------------------------------|----------------------------------|------------------------------------------------------|------|
|                             | Adjusted Mean<br>Change (95% CI) | Adjusted Mean<br>Change (95% CI) |                                                      |      |
| Total (n=444)               |                                  |                                  |                                                      |      |
| CMR (sum of Z scores)       | -0.05 (-0.09,-0.00)              | -0.02 (-0.07,0.03)               | -0.03 (-0.10,0.04)                                   | 0.01 |
| Fasting glucose (mg/dL)     | -0.7 (-2.7,1.3)                  | 1.3 (-0.8, 3.4)                  | -2.0 (-4.9, 1.0)                                     | 0.02 |
| Fasting insulin (uU/mL)     | -2.7 (-9.2,3.8)                  | -6.4 (-13.3,0.4)                 | 3.7 (-5.8,13.3)                                      | 0.04 |
| HDL-cholesterol (mg/dL)     | 1.0 (-0.3,2.3)                   | -0.3 (-1.8,1.1)                  | 1.4 (-0.6,3.3)                                       | 0.01 |
| Triglycerides (mg/dL)       | -2.9 (-10.6,4.9)                 | 2.8 (-5.4,10.9)                  | -5.6 (-17.0,5.7)                                     | 0.03 |
| Diastolic BP (mm Hg)        | 0.1 (-1.2,1.4)                   | -0.7 (-2.1,0.6)                  | 0.9 (-1.0,2.8)                                       | 0.06 |
| Systolic BP (mm Hg)         | -2.1 (-4.3,0.1)                  | -1.7 (-4.0,0.5)                  | -0.4 (-3.5,2.8)                                      | 0.08 |
| Additional outcomes         |                                  |                                  |                                                      |      |
| LDL-cholesterol (mg/dL)     | 0.5 (-2.0,2.9)                   | 3.3 (0.7,6.0)                    | -2.9 (-6.6, 0.8)                                     | 0.00 |
| Dysglycemic subgroup (n=95) |                                  |                                  |                                                      |      |
| CMR (sum of Z scores)       | -0.15 (-0.27,-0.04)              | 0.02 (-0.12, 0.17)               | -0.18 (-0.37, 0.01)                                  | 0.03 |
| Fasting glucose (mg/dL)     | -6.6 (-13.4,0.3)                 | 0.6 (-7.6, 8.9)                  | -7.2 (-18.2,3.9)                                     | 0.02 |
| HDL-cholesterol (mg/dL)     | 0.3 (-1.6, 2.2)                  | 0.1 (-2.2, 2.4)                  | 0.2 (-2.9,3.2)                                       | 0.00 |
| Triglycerides (mg/dL)       | -13.4 (-33.5,6.7)                | 4.0 (-18.2,26.2)                 | -17.5 (-47.8,12.9)                                   | 0.23 |
| Diastolic BP (mm Hg)        | -0.6 (-3.4,2.2)                  | 0.2 (-2.8,3.3)                   | -0.8 (-5.0, 3.4)                                     | 0.21 |
| Systolic BP (mm Hg)         | -5.1 (-10.8,0.6)                 | 1.5 (-4.5,7.5)                   | -6.6 (-15.0,1.7)                                     | 0.29 |
| Additional outcomes         |                                  |                                  |                                                      |      |
| HbA1c (%)                   | -0.0 (-0.3,0.2)                  | 0.2 (-0.1,0.5)                   | -0.3 (-0.7,0.2)                                      | 0.22 |
| LDL-cholesterol (mg/dL)     | -3.6 (-9.1,1.8)                  | 3.5 (-3.3,10.3)                  | -7.1 (-16.1,1.8)                                     | 0.00 |
| Weight (kg)                 | -1.9 (-3.9,0.1)                  | 1.6 (-0.7,3.9)                   | -3.5 (-6.6,-0.4)                                     | 0.03 |
| BMI (kg/m <sup>2</sup> )    | -0.7 (-1.4,0.0)                  | 0.5 (-0.3,1.4)                   | -1.2 (-2.4,-0.1)                                     | 0.01 |
| Total body fat (%)          | -0.9 (-1.8,-0.0)                 | 0.5 (-0.5,1.5)                   | -1.4 (-2.8,-0.1)                                     | 0.00 |

CMR = summary continuous metabolic risk score; HDL = high-density lipoprotein; BP = blood pressure; BMI = body mass index.
